# Supplementary material for: Solid state interactions in the La–Au–Mg system: phase equilibria, novel compounds and chemical bonding
Source: Royal Society of Chemistry journal article supplement (doi:10.1039/d0dt02359k), 2020-01-01
Supplement: d0dt02359k1.pdf [file d0dt02359k1.pdf]

## SUPPORTING MATERIAL

**Solid state interactions in the La-Au-Mg system:  
phase equilibria, novel compounds and chemical bonding**

R. Freccero<sup>1,2</sup>, S. De Negri<sup>1,\*</sup>, A. Saccone<sup>1</sup>, P. Solokha<sup>1</sup>

*<sup>1</sup>Dipartimento di Chimica e Chimica Industriale, Università degli Studi di Genova,  
via Dodecaneso 31, 16146 Genova, Italy*

*<sup>2</sup>Max-Planck-Institut für Chemische Physik fester Stoffe  
Nöthnitzer Straße 40, 01187 Dresden (Germany) (present address)*

## Literature data on the La-Au-Mg system in the range of interest

The La-Mg, La-Au ( $\geq 50$  at.% La) and Mg-Au ( $\geq 75$  at.% La) binary boundary systems are briefly commented in the following. The recently reviewed<sup>1</sup> La-Mg binary system, includes six intermetallic phases (LaMg, LaMg<sub>2</sub>, LaMg<sub>3</sub>, La<sub>2</sub>Mg<sub>17</sub>, La<sub>5</sub>Mg<sub>41</sub>, and LaMg<sub>12</sub>), all forming peritectically except for LaMg<sub>3</sub> (*cF16*-BiF<sub>3</sub>) which forms congruently. Two of these phases, LaMg<sub>2</sub> (*cF24*-MgCu<sub>2</sub>) and La<sub>5</sub>Mg<sub>41</sub> (*tI92*-Ce<sub>5</sub>Mg<sub>41</sub>) are reported to decompose at 725 and about 600 °C respectively, in agreement with previous data.<sup>2,3</sup> The crystal structures of the La-Mg binary phases are generally well assessed, nevertheless, two of them were recently re-determined: the La<sub>2</sub>Mg<sub>17</sub> phase, previously reported as *hP38*-Th<sub>2</sub>Ni<sub>17</sub>, was assigned to the disordered CeMg<sub>10.3</sub> prototype,<sup>4</sup> and the LaMg<sub>12</sub> phase, usually ascribed to the tetragonal ThMn<sub>12</sub> structure type, was instead found to be orthorhombic with a giant unit cell, and stoichiometry of LaMg<sub>~11</sub>.<sup>5</sup>

The La-Au intermetallic compounds involved in our investigation are La<sub>2</sub>Au and LaAu.<sup>6,7</sup> They form peritectically at 668°C (LaAu<sub>2</sub>) and by congruent melting at 1323°C (LaAu). The LaAu presents two crystalline forms, the HT form, *oS8*-TII type, at temperature higher than 660 °C and the LT form, *oP8*-FeB. The possible existence of the La<sub>7</sub>Au<sub>3</sub> compound (*hP20*-Th<sub>7</sub>Fe<sub>3</sub>) was recently reported by Ovchinnikov et al.<sup>8</sup>

The only Mg-Au binary compound involved in this study is AuMg<sub>3</sub>, congruently melting at 818°C. The crystal structure of this compound was revised several times after its first investigation from XRD powder diffraction<sup>9</sup>; a hexagonal acentric structural model (*hP24*-Cu<sub>3</sub>P) was finally established for it from single crystal studies<sup>10</sup>, being a superstructure of that proposed in the pioneering work.

Only the stoichiometric equiatomic phase LaAuMg (*hP9*-ZrNiAl) is reported in the literature<sup>11</sup> in the compositional range of interest.

**Table S1.** SEM/EDXS (at.%) and XRD data on the investigated La-Au-Mg samples (if not specified, samples were annealed at 400 °C).

| Nr. | Nominal comp.<br>EDXS comp.                                                                                        | Phases                                                                                                                                                                                                                     | EDXS comp.<br>La; Au; Mg                                                      | Crystal structure                                                                                                                                                 | Lattice parameters (nm)                                                        |           |                                      |
|-----|--------------------------------------------------------------------------------------------------------------------|----------------------------------------------------------------------------------------------------------------------------------------------------------------------------------------------------------------------------|-------------------------------------------------------------------------------|-------------------------------------------------------------------------------------------------------------------------------------------------------------------|--------------------------------------------------------------------------------|-----------|--------------------------------------|
|     |                                                                                                                    |                                                                                                                                                                                                                            |                                                                               |                                                                                                                                                                   | <i>a</i>                                                                       | <i>b</i>  | <i>c</i>                             |
| 1   | La <sub>3</sub> Au <sub>7</sub> Mg <sub>90</sub><br>La <sub>3.9</sub> Au <sub>7.7</sub> Mg <sub>88.4</sub>         | LaMg <sub>12-x</sub><br>AuMg <sub>3</sub><br>(Mg)                                                                                                                                                                          | 8.5; 1.1; 90.4<br>0.6; 25.3; 74.1<br>1.5; 1.8; 96.7                           | <i>o</i> I346-10.32-LaMg <sub>-11</sub><br><i>h</i> P24-Cu <sub>3</sub> P<br><i>h</i> P2-Mg                                                                       | 1.0329(8)<br>0.8059(3)<br>0.3206(1)                                            |           | 0.772(1)<br>0.8472(6)<br>0.5201(2)   |
| 2   | La <sub>8</sub> Au <sub>7</sub> Mg <sub>85</sub><br>La <sub>9.2</sub> Au <sub>7.0</sub> Mg <sub>83.8</sub>         | La <sub>2</sub> (Mg,Au) <sub>17</sub><br>$\tau_1$ -La <sub>1.82</sub> Au <sub>3+x</sub> Mg <sub>14.36-x</sub><br>AuMg <sub>3</sub>                                                                                         | 10.0; 2.9; 87.1<br>9.6; 16.4; 74.0<br>0.4; 26.9; 72.7                         | <i>h</i> P42-x-CeMg <sub>10.3</sub><br><i>h</i> P42-x-CeMg <sub>10.3</sub><br><i>h</i> P24-Cu <sub>3</sub> P                                                      | 1.0263(6)<br>0.9944(4)<br>0.8064(3)                                            |           | 1.0229(5)<br>0.9947(6)<br>0.8472(5)  |
| 3   | La <sub>16</sub> Au <sub>4</sub> Mg <sub>80</sub><br>La <sub>16.8</sub> Au <sub>3.7</sub> Mg <sub>79.5</sub>       | LaMg <sub>3</sub><br>La <sub>2</sub> (Mg,Au) <sub>17</sub><br>$\tau_1$ -La <sub>1.82</sub> Au <sub>3+x</sub> Mg <sub>14.36-x</sub>                                                                                         | 24.4; 0.5; 75.1<br>11.2; 1.8; 87.0<br>11.4; 14.6; 74.0                        | <i>c</i> F16-BiF <sub>3</sub><br><i>h</i> P42-x-CeMg <sub>10.3</sub><br><i>h</i> P42-x-CeMg <sub>10.3</sub>                                                       | 0.74930(3)<br>1.0329(1)<br>0.9986(2)                                           |           | 1.0174(3)<br>0.9907(3)               |
| 4   | La <sub>17</sub> Au <sub>10</sub> Mg <sub>73</sub><br>La <sub>18.6</sub> Au <sub>10.4</sub> Mg <sub>71.0</sub>     | LaMg <sub>3</sub><br>$\tau_1$ -La <sub>1.82</sub> Au <sub>3+x</sub> Mg <sub>14.36-x</sub><br>$\tau_2$ -La <sub>3</sub> Au <sub>4-x</sub> Mg <sub>12+x</sub>                                                                | 26.0; 0.2; 73.8<br>11.7; 16.9; 71.4<br>17.9; 15.5; 66.5                       | <i>c</i> F16-BiF <sub>3</sub><br><i>h</i> P42-x-CeMg <sub>10.3</sub><br><i>h</i> P38-Gd <sub>3</sub> Ru <sub>4</sub> Al <sub>12</sub>                             | 0.7495(2)<br>0.9958(6)<br><i>not measurable</i>                                |           | 0.9871(7)                            |
| 5   | La <sub>7</sub> Au <sub>18</sub> Mg <sub>75</sub><br>La <sub>8.4</sub> Au <sub>19.2</sub> Mg <sub>72.4</sub>       | AuMg <sub>3</sub><br>$\tau_1$ -La <sub>1.82</sub> Au <sub>3+x</sub> Mg <sub>14.36-x</sub><br>La <sub>2</sub> (Mg,Au) <sub>17</sub> *                                                                                       | 0.2; 31.9; 67.9<br>10.4; 16.4; 73.2<br>9.8; 4.0; 86.2                         | <i>h</i> P24-Cu <sub>3</sub> P<br><i>h</i> P42-x-CeMg <sub>10.3</sub><br><i>h</i> P42-x-CeMg <sub>10.3</sub>                                                      | 0.8076(2)<br>0.9930(4)<br><i>not measurable</i>                                |           | 0.8489(4)<br>0.9957(2)               |
| 6   | La <sub>11.5</sub> Au <sub>16</sub> Mg <sub>72.5</sub><br>La <sub>12.4</sub> Au <sub>17.9</sub> Mg <sub>69.8</sub> | $\tau_1$ -La <sub>1.82</sub> Au <sub>3+x</sub> Mg <sub>14.36-x</sub><br>$\tau_2$ -La <sub>3</sub> Au <sub>4-x</sub> Mg <sub>12+x</sub><br>LaMg <sub>3</sub> *                                                              | 11.2; 17.6; 71.2<br>17.1; 19.6; 63.3<br>26.3; 0.0; 73.7                       | <i>h</i> P42-3.66-CeMg <sub>10.3</sub><br><i>h</i> P38-Gd <sub>3</sub> Ru <sub>4</sub> Al <sub>12</sub><br><i>c</i> F16-BiF <sub>3</sub>                          | 0.9961(6)<br>0.9765(3)<br><i>not measurable</i>                                |           | 0.989(1)                             |
| 7   | La <sub>24</sub> Au <sub>18</sub> Mg <sub>58</sub><br>La <sub>24.2</sub> Au <sub>16.5</sub> Mg <sub>59.3</sub>     | $\tau_3$ -LaAuMg <sub>2</sub><br>$\tau_2$ -La <sub>3</sub> Au <sub>4-x</sub> Mg <sub>12+x</sub><br>LaMg <sub>3</sub><br>$\tau_4$ -LaAu <sub>1+x</sub> Mg <sub>1-x</sub> *                                                  | 26.4; 26.6; 47.0<br>17.3; 17.7; 65.0<br>26.3; 0.5; 73.2<br>34.2; 34.4; 31.4   | <i>o</i> S16-MgCuAl <sub>2</sub><br><i>h</i> P38-Gd <sub>3</sub> Ru <sub>4</sub> Al <sub>12</sub><br><i>c</i> F16-BiF <sub>3</sub><br><i>h</i> P9-ZrNiAl          | 0.4524(2)<br>0.9782(9)<br>0.74816(8)<br>0.7792(6)                              | 1.0614(4) | 0.8097(2)<br>1.039(3)<br>0.4253(3)   |
| 8#  | La <sub>17</sub> Au <sub>18</sub> Mg <sub>65</sub><br>La <sub>20.0</sub> Au <sub>21.2</sub> Mg <sub>58.8</sub>     | $\tau_3$ -LaAuMg <sub>2</sub><br>$\tau_2$ -La <sub>3</sub> Au <sub>4-x</sub> Mg <sub>12+x</sub><br>$\tau_1$ -La <sub>1.82</sub> Au <sub>3+x</sub> Mg <sub>14.36-x</sub><br>$\tau_4$ -LaAu <sub>1+x</sub> Mg <sub>1-x</sub> | 26.2; 27.1; 46.7<br>17.1; 19.5; 63.4<br>11.5; 17.3; 71.2<br>33.8; 35.2; 30.9  | <i>o</i> S16-MgCuAl <sub>2</sub><br><i>h</i> P38-Gd <sub>3</sub> Ru <sub>4</sub> Al <sub>12</sub><br><i>h</i> P42-3.66-CeMg <sub>10.3</sub><br><i>h</i> P9-ZrNiAl | 0.4518(3)<br>0.9787(5)<br>0.9953(9)<br><i>not measurable</i>                   | 1.0614(4) | 0.8094(2)<br>1.0415(9)<br>0.9867(7)  |
| 9#  | La <sub>25</sub> Au <sub>25</sub> Mg <sub>50</sub><br>La <sub>23.0</sub> Au <sub>22.9</sub> Mg <sub>54.1</sub>     | $\tau_3$ -LaAuMg <sub>2</sub><br>$\tau_4$ -LaAu <sub>1+x</sub> Mg <sub>1-x</sub><br>$\tau_2$ -La <sub>3</sub> Au <sub>4-x</sub> Mg <sub>12+x</sub><br>$\tau_1$ -La <sub>1.82</sub> Au <sub>3+x</sub> Mg <sub>14.36-x</sub> | 25.8; 26.8; 47.5<br>33.5; 35.1; 31.4<br>16.8; 22.1; 61.2<br>11.4; 17.4; 71.2  | <i>o</i> S16-MgCuAl <sub>2</sub><br><i>h</i> P9-ZrNiAl<br><i>h</i> P38-Gd <sub>3</sub> Ru <sub>4</sub> Al <sub>12</sub><br><i>h</i> P42-3.66-CeMg <sub>10.3</sub> | 0.45228(7)<br>0.78002(8)<br>0.9718(2)<br><i>not measurable</i>                 | 1.0631(1) | 0.8105(1)<br>0.42554(7)<br>1.0372(3) |
| 10  | La <sub>30</sub> Au <sub>10</sub> Mg <sub>60</sub><br>La <sub>31.6</sub> Au <sub>11.5</sub> Mg <sub>56.8</sub>     | LaMg <sub>3</sub><br>$\tau_4$ -LaAu <sub>1+x</sub> Mg <sub>1-x</sub><br>LaMg <sub>2</sub>                                                                                                                                  | 71.8; 0.4; 27.8<br>34.5; 32.7; 31.8<br><i>not measurable</i>                  | <i>c</i> F16-BiF <sub>3</sub><br><i>h</i> P9-ZrNiAl<br><i>c</i> F24-MgCu <sub>2</sub>                                                                             | 0.7514(1)<br>0.7816(1)<br>0.88078(8)                                           |           | 0.4259(1)                            |
| 11  | La <sub>37</sub> Au <sub>10</sub> Mg <sub>53</sub><br>La <sub>37.8</sub> Au <sub>8.9</sub> Mg <sub>53.3</sub>      | LaMg <sub>2</sub><br>LaMg<br>$\tau_4$ -LaAu <sub>1+x</sub> Mg <sub>1-x</sub>                                                                                                                                               | 35.0; 0.0; 65.0<br>47.8; 0.0; 52.2<br>34.6; 32.7; 32.7                        | <i>c</i> F24-MgCu <sub>2</sub><br><i>c</i> P2-CsCl<br><i>h</i> P9-ZrNiAl                                                                                          | 0.8800(1)<br>0.3961(2)<br>0.7810(3)                                            |           | 0.4259(3)                            |
| 12  | La <sub>60</sub> Au <sub>3</sub> Mg <sub>37</sub><br>La <sub>61.0</sub> Au <sub>2.5</sub> Mg <sub>36.5</sub>       | LaMg<br>(La)<br>$\tau_4$ -LaAu <sub>1+x</sub> Mg <sub>1-x</sub>                                                                                                                                                            | 54.9; 0.2; 44.9<br>96.3; 0.3; 3.4<br><i>not measurable</i>                    | <i>c</i> P2-CsCl<br><i>h</i> P4-Nd<br><i>h</i> P9-ZrNiAl                                                                                                          | <i>scarce quality of XRD pattern, sufficient only for phase identification</i> |           |                                      |
| 13  | La <sub>73</sub> Au <sub>10</sub> Mg <sub>17</sub><br>La <sub>72.6</sub> Au <sub>9.6</sub> Mg <sub>17.8</sub>      | (La)<br>$\tau_4$ -LaAu <sub>1+x</sub> Mg <sub>1-x</sub><br>LaMg                                                                                                                                                            | 96.3; 0.4; 3.3<br>36.2; 34.1; 29.7<br>53.6; 0.2; 46.2                         | <i>h</i> P4-Nd<br><i>h</i> P9-ZrNiAl<br><i>c</i> P2-CsCl                                                                                                          | <i>scarce quality of XRD pattern, sufficient only for phase identification</i> |           |                                      |
| 14  | La <sub>56</sub> Au <sub>27</sub> Mg <sub>17</sub><br>La <sub>57.3</sub> Au <sub>26.5</sub> Mg <sub>16.2</sub>     | (La)<br>$\tau_4$ -LaAu <sub>1+x</sub> Mg <sub>1-x</sub><br>La <sub>2</sub> Au                                                                                                                                              | 98.9; 0.6; 0.5<br>35.2; 34.8; 30.0<br>65.4; 33.5; 1.1                         | <i>h</i> P4-Nd<br><i>h</i> P9-ZrNiAl<br><i>o</i> P12-Co <sub>2</sub> Si-b                                                                                         | 0.3770(2)<br>0.7818(2)<br>0.742(2)                                             | 0.5117(6) | 1.2158(8)<br>0.4262(2)<br>0.940(1)   |
| 15  | La <sub>71</sub> Au <sub>25</sub> Mg <sub>4</sub><br>La <sub>66.5</sub> Au <sub>27.9</sub> Mg <sub>5.6</sub>       | La <sub>2</sub> Au<br>(La)<br>$\tau_4$ -LaAu <sub>1+x</sub> Mg <sub>1-x</sub><br>$\tau_5$ -La <sub>55</sub> Au <sub>40</sub> Mg <sub>5</sub> *                                                                             | 63.9; 35.1; 1.0<br>97.5; 0.3; 2.3<br><i>not measurable</i><br>54.9; 41.7; 3.4 | <i>o</i> P12-Co <sub>2</sub> Si-b<br><i>h</i> P4-Nd<br><i>h</i> P9-ZrNiAl<br><i>t</i> P10-U <sub>3</sub> Si <sub>2</sub>                                          | 0.743(4)<br>0.376(1)<br><i>not measurable</i><br><i>not measurable</i>         | 0.512(5)  | 0.940(1)<br>1.216(4)                 |
| 16  | La <sub>50</sub> Au <sub>40</sub> Mg <sub>10</sub><br>La <sub>49.0</sub> Au <sub>40.0</sub> Mg <sub>11.0</sub>     | LaAu<br>$\tau_5$ -La <sub>55</sub> Au <sub>40</sub> Mg <sub>5</sub><br>$\tau_4$ -LaAu <sub>1+x</sub> Mg <sub>1-x</sub>                                                                                                     | 49.4; 49.7; 0.9<br>53.6; 40.9; 5.5<br>35.4; 35.0; 29.6                        | <i>o</i> P8-FeB-b<br><i>t</i> P10-U <sub>3</sub> Si <sub>2</sub><br><i>h</i> P9-ZrNiAl                                                                            | <i>scarce quality of XRD pattern, sufficient only for phase identification</i> |           |                                      |
| 17  | La <sub>50</sub> Au <sub>40</sub> Mg <sub>10</sub><br>La <sub>48.9</sub> Au <sub>41.1</sub> Mg <sub>10.0</sub>     | LaAu<br>$\tau_5$ -La <sub>55</sub> Au <sub>40</sub> Mg <sub>5</sub><br>$\tau_4$ -LaAu <sub>1+x</sub> Mg <sub>1-x</sub><br>La <sub>2</sub> Au*                                                                              | 47.5; 50.7; 1.8<br>52.8; 40.9; 6.3<br>37.0; 34.9; 28.1<br>66.1; 33.6; 0.3     | <i>o</i> P8-FeB-b<br><i>t</i> P10-U <sub>3</sub> Si <sub>2</sub><br><i>h</i> P9-ZrNiAl<br><i>o</i> P12-Co <sub>2</sub> Si-b                                       | ~0.830<br>0.780(1)<br><i>not measurable</i>                                    |           | ~0.404<br>0.427(5)                   |

|           |                                                                                                              |                                                                                                               |                                                                         |                                                                                                                         |                                                                                |
|-----------|--------------------------------------------------------------------------------------------------------------|---------------------------------------------------------------------------------------------------------------|-------------------------------------------------------------------------|-------------------------------------------------------------------------------------------------------------------------|--------------------------------------------------------------------------------|
| <b>18</b> | La <sub>55</sub> Au <sub>42</sub> Mg <sub>3</sub><br>La <sub>51.3</sub> Au <sub>44.2</sub> Mg <sub>4.5</sub> | La <sub>2</sub> Au<br>LaAu<br>$\tau_5 \sim \text{La}_{55}\text{Au}_{40}\text{Mg}_5$<br>$\alpha\text{-(La)}^*$ | 64.7; 34.5; 0.8<br>48.5; 50.2; 1.3<br>53.7; 41.7; 4.6<br>96.8; 3.2; 0.0 | <i>oP12</i> -Co <sub>2</sub> Si-b<br><i>oP8</i> -FeB-b<br><i>tP10</i> -U <sub>3</sub> Si <sub>2</sub><br><i>hP4</i> -Nd | <i>scarce quality of XRD pattern, sufficient only for phase identification</i> |
|-----------|--------------------------------------------------------------------------------------------------------------|---------------------------------------------------------------------------------------------------------------|-------------------------------------------------------------------------|-------------------------------------------------------------------------------------------------------------------------|--------------------------------------------------------------------------------|

\* – out of equilibrium phase, small amount

# – samples obtained by controlled thermal treatment

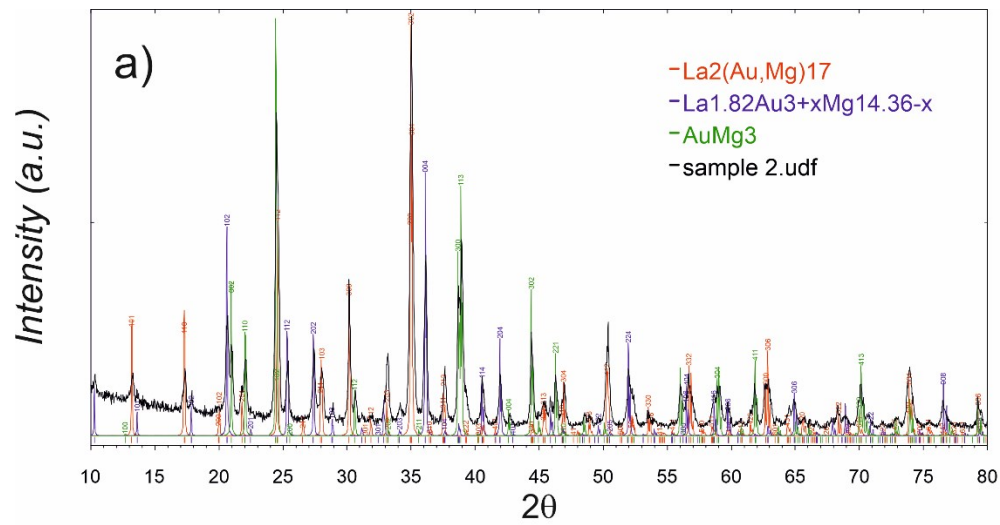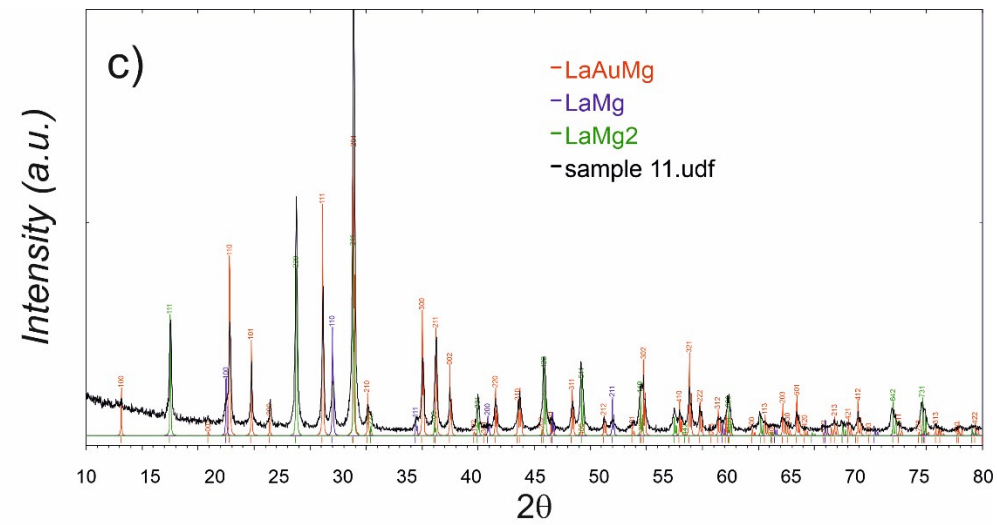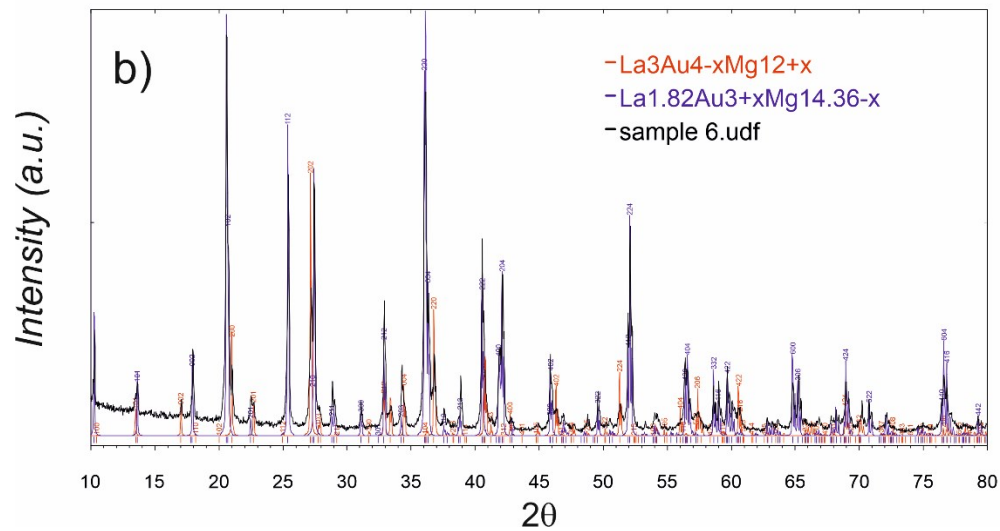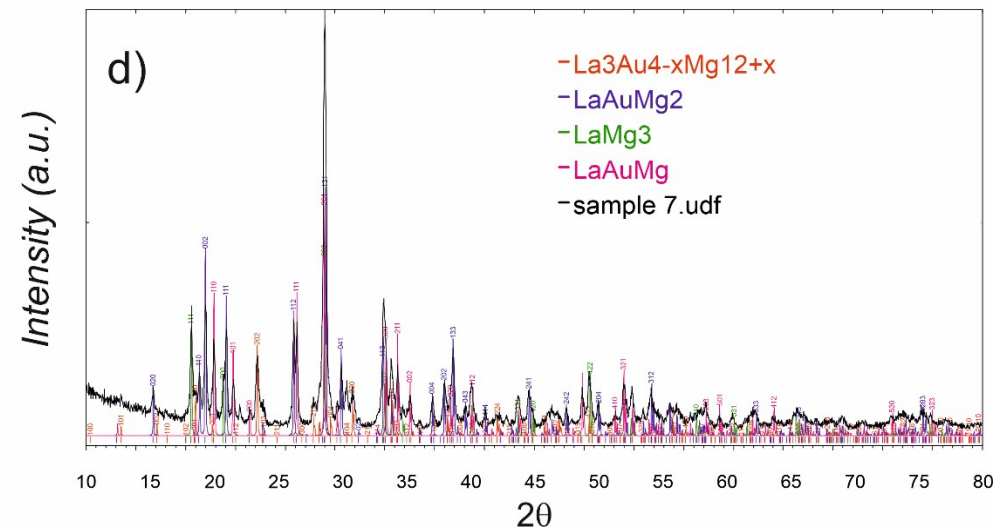

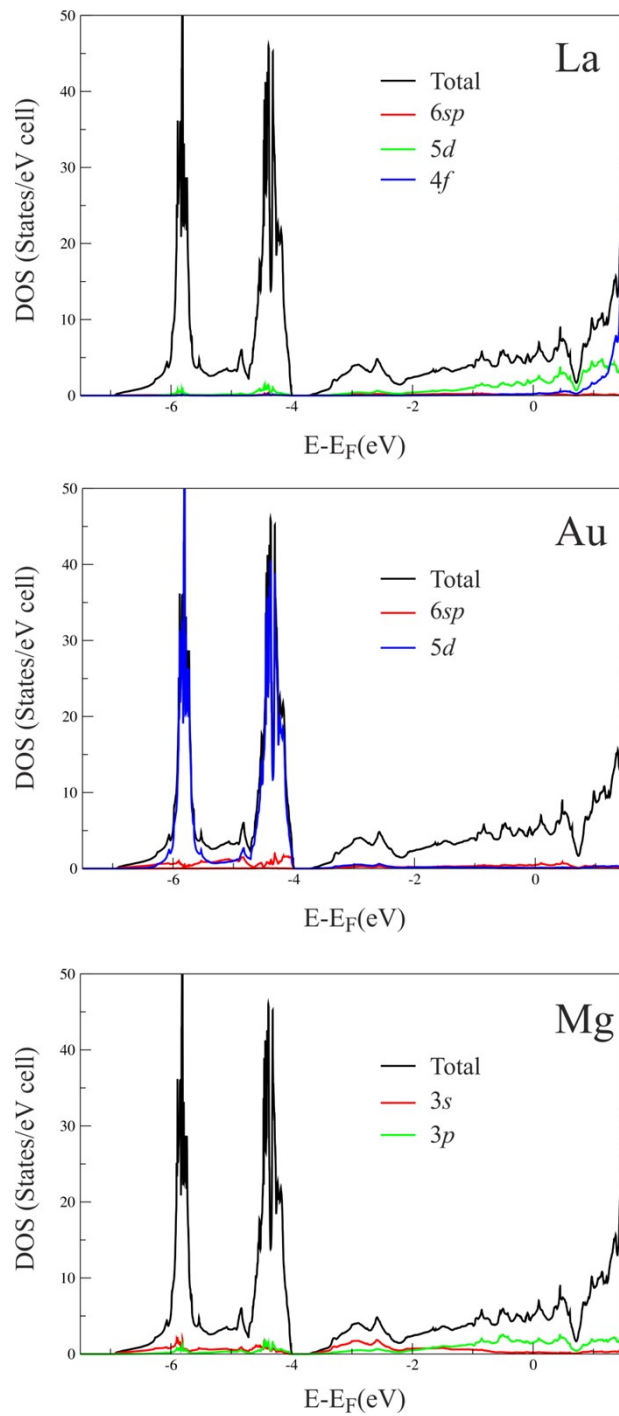

**Figure S2.** Calculated orbital-projected DOS for La, Au and Mg in fully relativistic approximation for  $\text{LaAuMg}_2$ .

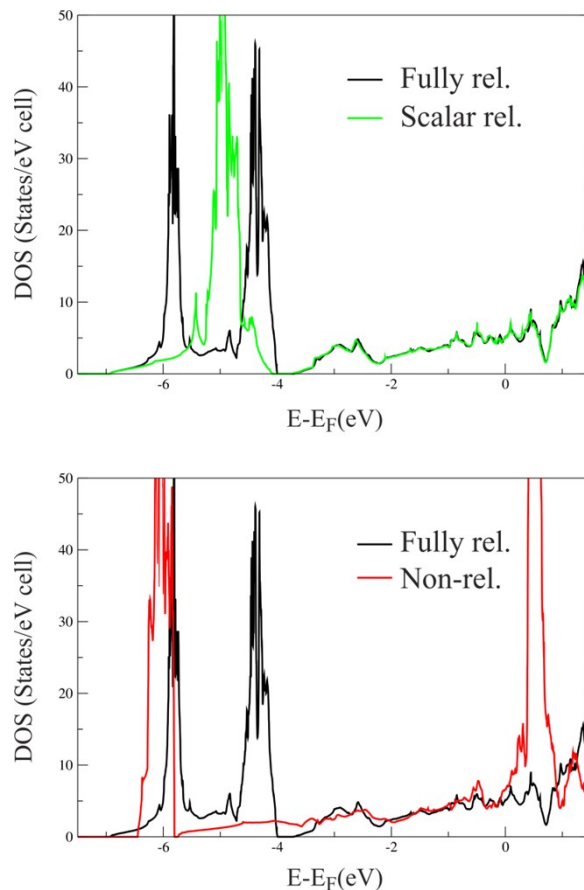

**Figure S3.** Comparison between the total DOS calculated in fully relativistic (black curve), scalar relativistic (green) and non-relativistic (red) approximation.

In the scalar relativistic calculation, where the spin-orbit interactions are not included, the two peaks at about -6 and -4 eV merge into one around -5 eV.

A quite different trend is observed for the non-relativistic curve; in particular, the  $5d$  states are shifted towards lower energy due to the missing relativistic inner shells contraction which results in a reduced effective nuclear charge ( $Z_{eff}$ ). This effect, also known as *indirect relativist effect*, leads to a relevant destabilization (shift at higher energy) and expansion for the outer and more diffuse  $f$ - and  $d$ -orbitals<sup>12</sup>.

**Table S2.** QTAIM effective charges and atomic basins volume obtained on the basis of electron densities resulting from non-relativistic and scalar-relativistic calculations.

| Species<br>$X$ | Non-relativistic |        | Scalar-relativistic |        |
|----------------|------------------|--------|---------------------|--------|
|                | $Q^{eff}(X)$     | $V(X)$ | $Q^{eff}(X)$        | $V(X)$ |
| La             | +0.90            | 198.6  | +1.06               | 194.0  |
| Au             | -2.48            | 272.4  | -2.72               | 282.1  |
| Mg             | +0.79            | 99.8   | +0.83               | 97.3   |

**Table S3.** ELI-D valence basin population  $\bar{N}(B_i)$ , bond fractions and effective atomicity for A, B and C basins (see figure 5 in the main text) obtained from the non-relativistic calculation. To make the comparison easier Table 3 from the main text is also reported.

| Non-relativistic         |                                       |                |                          |                          |                          |
|--------------------------|---------------------------------------|----------------|--------------------------|--------------------------|--------------------------|
| ELI-D<br>basin ( $B_i$ ) | Effective atomicity<br>$Mg_2Au_2La_x$ | $\bar{N}(B_i)$ | $\sum_j^2 p(B_i^{Mg_j})$ | $\sum_j^2 p(B_i^{Au_j})$ | $\sum_j^x p(B_i^{La_j})$ |
| A                        | $Au_2Mg_2La_2$ (6a)                   | 1.680          | 0.197                    | 0.723                    | 0.060                    |
| B                        | $Mg_2La_4Au_2$ (8a)                   | 2.215          | 0.585                    | 0.203                    | 0.210                    |
| C                        | $Au_2Mg_2La_3$ (7a)                   | 1.658          | 0.239                    | 0.670                    | 0.091                    |

| Scalar-relativistic      |                                       |                |                          |                          |                          |
|--------------------------|---------------------------------------|----------------|--------------------------|--------------------------|--------------------------|
| ELI-D<br>basin ( $B_i$ ) | Effective atomicity<br>$Mg_2Au_2La_x$ | $\bar{N}(B_i)$ | $\sum_j^2 p(B_i^{Mg_j})$ | $\sum_j^2 p(B_i^{Au_j})$ | $\sum_j^x p(B_i^{La_j})$ |
| A                        | $Au_2Mg_2La_2$ (6a)                   | 2.193          | 0.134                    | 0.800                    | 0.057                    |
| B                        | $Mg_2La_4Au_2$ (8a)                   | 2.147          | 0.620                    | 0.109                    | 0.249                    |
| C                        | $Au_2Mg_2La_3$ (7a)                   | 1.328          | 0.230                    | 0.687                    | 0.083                    |

**Table S4.** Population of ELI-D core basins.  $n$  denotes the main quantum number.

|             | Species $X$ | $\sum_{i=1}^{n-1} \bar{N}_i^{ELI}(X)$ | $N_{core}$ |
|-------------|-------------|---------------------------------------|------------|
| Non-rel.    | Mg          | 10.065                                | 10         |
|             | La          | 55.236                                | 54         |
|             | Au          | 77.549                                | 77*        |
| Scalar-rel. | Mg          | 10.063                                | 10         |
|             | La          | 54.957                                | 54         |
|             | Au          | 77.072                                | 77*        |

\*Assuming a  $[Xe] 4f^{14} 5d^9 6s^2$  electronic configuration for Au.

**Table S5.** Average population of gold penultimate shell ELI-D basins together with the population of their portions intersected by La atoms.  $n$  denotes the main quantum number.

|             | $\bar{N}_{n-1}^{ELI}(Au)$ | $\bar{N}(Au^{Au})$ | $\bar{N}(Au^{La})$<br>0.307 nm | $\bar{N}(Au^{La})$<br>0.320 nm |
|-------------|---------------------------|--------------------|--------------------------------|--------------------------------|
| Non-rel.    | 18.580                    | 18.555             | 0.008                          | 0.008                          |
| Scalar-rel. | 18.697                    | 18.649             | 0.028                          | 0.010                          |

Summarizing, relativistic effects leads to:



- 1) increasing charge transfer between La and Au; that of Mg is practically unaffected (Table S2);
- 2) increasing of A-basins population and decreasing of the C basins population of about 0.5 and 0.3 e, respectively. The B population is practically the same. The number and location of ELI-D attractors (and related basins) is the same (Table S3);
- 3) the same effective atomicities. In all cases, La contributions doesn't change noticeably. The Mg contribution to B-basins increases and decreases in the A-one; the Au behavior is opposite. The contribution to the C-basins doesn't change noticeably (Table S3);
- 4) increasing of the number of the electrons in the valence region from 7.23 to 7.86 e/f.u.. This effect is caused by a reduced storage (in the scalar relativistic treatment) of electrons in La and Au core region. Population of Mg core is the same (Table S4);
- 5) more covalent Au–La bonding. In fact, gold bulges are bigger and more intersected by La QTAIM atoms (Table S).

### References

- 1 A. Berche, P. Benigni, J. Rogez and M. C. Record, *J. Therm. Anal. Calorim.*, 2012, **107**, 797–807.
- 2 P. Manfrinetti and K. A. Gschneidner, *J. Less-Common Met.*, 1986, **123**, 267–275.
- 3 M. Giovannini, A. Saccone, R. Marazza and R. Ferro, *Metall. Mater. Trans. A*, 1995, **26**, 5–10.
- 4 S. De Negri, P. Solokha, V. Pavlyuk and A. Saccone, *Intermetallics*, 2011, **19**, 671–681.
- 5 R. V. Denys, A. A. Poletaev, J. K. Solberg, B. P. Tarasov and V. A. Yartys, *Acta Mater.*, 2010, **58**, 2510–2519.
- 6 T. B. Massalski, H. (Hiroaki) Okamoto and ASM International., *Binary alloy phase diagrams*, ASM International, 1990.
- 7 H. Q. Dong, X. M. Tao, H. S. Liu, T. Laurila and M. Paulastro-Kröckel, *J. Alloys Compd.*, 2011, **509**, 4439–4444.
- 8 A. Ovchinnikov and A.-V. Mudring, in *Exploratory studies in the intermetallic RE–Mn–Au systems (RE = rare-earth metal)*, 17th European Conference on Solid state Chemistry, Lille, France, 2019, p. P85.
- 9 K. Schubert and K. Anderko, *Z. Met.*, 1951, **42**, 321–325.
- 10 K. J. Range and P. Hafner, *J. Alloys Compd.*, 1993, 191, L5–L7.
- 11 R. Pöttgen, R.-D. Hoffmann, J. Renger, U. C. Rodewald and M. H. Möller, *Zeitschrift für Anorg. und Allg. Chemie*, 2000, **626**, 2257–2263.
- 12 P. Schwerdtfeger and M. Lein, in *Gold Chemistry*, Wiley-VCH Verlag GmbH & Co. KGaA, Weinheim, Germany, 2009, pp. 183–247.
